# Supplementary material
Source: Springer Nature journal article supplement (https://www.springermedizin.de/resource/supplementary/12955_2013_1169_MOESM2_ESM.pdf/9558960)

### EQ-5D utility score

Mean (95% Confidence Interval)

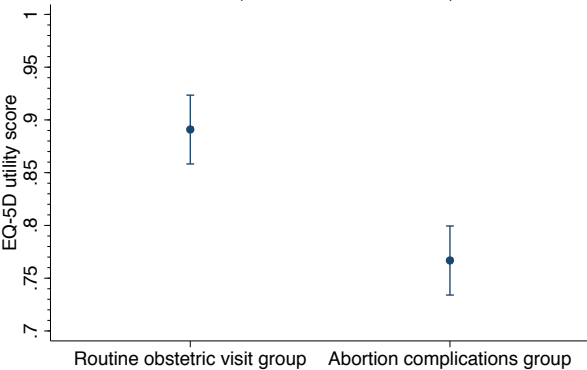

### EQ-VAS score

Mean (95% Confidence Interval)

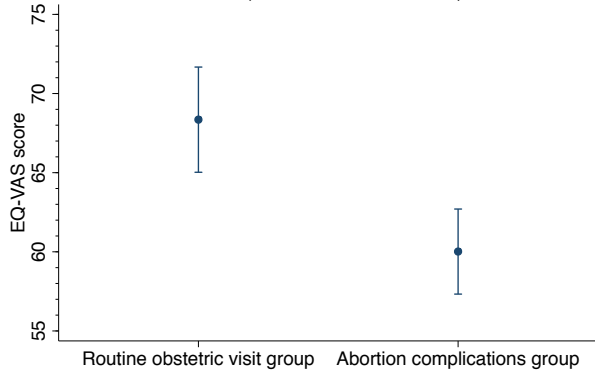

Supplement: MOESM2 [file 9558960]
